# Supplementary material
Source: Elsevier journal article supplement (https://www.sciencedirect.com/science/article/pii/S0214158219300477)
Supplement: mmc1 [file S0214158219300477:mmc1.pdf]

## ANEXO 1: ENCUESTA TELEFÓNICA

---

1- Antes de que le diagnosticaran el tumor en la mama, ¿había tenido alguna vez dolor mamario?

- ☐ NO
- ☐ SI \_\_\_\_\_

2- Tras el diagnóstico de la enfermedad, ¿tuvo dolor en la mama antes de la intervención?

- ☐ NO
- ☐ SI \_\_\_\_\_

3- Tras la cirugía, ¿ha presentado alguna sensación extraña o dolorosa en la zona de la cicatriz mamaria?

- ☐ NO
- ☐ SI

En caso de respuesta afirmativa:

3a) ¿Qué tipo de sensación ha tenido?

- ☐ Sensación extraña como hormigueo, picor, adormecimiento o tensión.
- ☐ Dolor como pinchazos, quemazón, presión dolorosa o dolor difuso.

3b) ¿Cuándo le apareció la sensación?

- ☐ A los pocos días de la cirugía
- ☐ Al cabo de unos meses de la cirugía
- ☐ Al cabo de años de la cirugía

3c) ¿Cuál es la duración de la sensación?

- ☐ Minutos
- ☐ Horas
- ☐ Días
- ☐ Constante

3d) ¿Con qué frecuencia se presenta la sensación?

- ☐ Esporádica
- ☐ Semanal
- ☐ Diaria
- ☐ Constante

3e) ¿Ha necesitado tomar algún tratamiento para controlar la sensación?

- ☐ NO
- ☐ SI

4- ¿Ha tenido alguna vez la sensación de que la mama operada todavía está presente?

- ☐ NO
- ☐ SI

En caso de respuesta afirmativa:

4a) ¿La sensación es dolorosa o desagradable?

- ☐ NO
- ☐ SÍ

4b) ¿Relaciona la sensación con algo? Alguna situación, alguna otra sensación, la toma de algún alimento, etc.

- ☐ NO
- ☐ SÍ

4c) ¿Cuándo le apareció la sensación?

- ☐ A los pocos días de la cirugía
- ☐ Al cabo de unos meses de la cirugía
- ☐ Al cabo de años de la cirugía

4e) ¿Cuál es la duración de la sensación?

- ☐ Minutos
- ☐ Horas
- ☐ Días

- ☐ Constante

4f) ¿Con qué frecuencia se presenta la sensación?

- ☐ Esporádica
- ☐ Semanal
- ☐ Diaria
- ☐ Constante

4g) ¿Ha necesitado tomar algún tratamiento para controlar la sensación?

- ☐ NO
- ☐ SI
